# Supplementary material for: COVID-19 and Parkinson’s Disease: Shared Inflammatory Pathways Under Oxidative Stress
Source: PubMed Central journal article supplement (PMC7693814; doi:10.3390/brainsci10110807), 2020-10-31
Supplement: brainsci-10-00807-s001.pdf [file brainsci-10-00807-s001.pdf]

## Supplementary Materials

**Table S1: Determining the proportion of p65 NFκB expressed in TH-positive control (untreated) and 6OHDA-treated dDCNs.**

|                        | Control (- 6OHDA) |       | Treated (+6OHDA) |       |
|------------------------|-------------------|-------|------------------|-------|
|                        | TH                | NFκB  | TH               | NFκB  |
| Mean of Assay 1        | 34.60             | 17.06 | 9.67             | 10.00 |
| Mean of Assay 2        | 36.13             | 18.22 | 10.13            | 11.00 |
| Mean of Assay 3        | 32.73             | 20.36 | 11.93            | 10.60 |
| Mean of All Assays     | 34.49             | 18.55 | 10.58            | 10.53 |
| Mean of All Assays %   | 100.00            | 53.78 | 30.67            | 30.54 |
| Total Ratio            | 0.54              |       | 1.00             |       |
| <b>Total Ratio (%)</b> | <b>54</b>         |       | <b>100</b>       |       |
| <b>t-Test</b>          | <b>0.01</b>       |       |                  |       |

**Table 2. 6OHDA increased activation of NFκB in dDCNs.**

|                       | MEAN         |                  |
|-----------------------|--------------|------------------|
|                       | Control      | Treated (+6OHDA) |
| NFκB Assay1           | 0.824        | 1.360            |
| NFκB Assay 2          | 0.686        | 1.217            |
| NFκB Assay3           | 0.955        | 1.349            |
| NFκB Assay4           | 0.363        | 1.438            |
| NFκB Assay 5          | 0.310        | 1.542            |
| Mean Assay            | 0.627        | 1.381            |
| <b>Mean Assay (%)</b> | <b>100</b>   | <b>220</b>       |
| SD                    | 0.28         | 0.12             |
| SD (%)                | 28.31        | 11.99            |
| <b>t-Test</b>         | <b>0.002</b> |                  |

**Table S3: Determining the proportion of Caspases-2, -3 and -8 expressed in NFκB positive control and 6OHDA-treated dDCNs**

|                        | Control (-6OHDA) |            | 6OHDA Treated |            | Control (-6OHDA) |            | 6OHDA Treated |            | Control (-6OHDA) |            | 6OHDA Treated |            |
|------------------------|------------------|------------|---------------|------------|------------------|------------|---------------|------------|------------------|------------|---------------|------------|
|                        | NFκB             | Caspa se-2 | NFκB          | Caspa se-2 | NFκB             | Caspas e-3 | NFκB          | Caspas e-3 | NFκB             | Caspa se-8 | NFκB          | Caspa se-8 |
| <b>Mean of Assay 1</b> | 36.6             | 19.33      | 10.00         | 8.13       | 41.93            | 11.00      | 10.47         | 5.47       | 19.67            | 7.60       | 9.87          | 9.87       |
| <b>Mean of Assay 7</b> | 42.33            | 16.01      | 8.00          | 8.33       | 41.40            | 11.20      | 9.93          | 6.00       | 24.20            | 8.21       | 10.40         | 10.40      |

|                        |        |       |       |       |        |       |       |       |        |       |       |       |  |
|------------------------|--------|-------|-------|-------|--------|-------|-------|-------|--------|-------|-------|-------|--|
| <b>Assay 2</b>         |        |       |       |       |        |       |       |       |        |       |       |       |  |
| <b>Mean</b>            | 41.93  | 18.56 | 10.87 | 8.80  | 39.67  | 12.00 | 10.53 | 5.27  | 26.40  | 8.13  | 12.00 | 12.00 |  |
| <b>of Assay 3</b>      |        |       |       |       |        |       |       |       |        |       |       |       |  |
| <b>Mean</b>            | 40.31  | 17.97 | 9.62  | 8.42  | 41.00  | 11.40 | 10.31 | 5.58  | 23.42  | 7.98  | 10.76 | 10.76 |  |
| <b>of All Assays</b>   |        |       |       |       |        |       |       |       |        |       |       |       |  |
| <b>Mean of</b>         | 100.00 | 44.57 | 23.87 | 20.89 | 100.00 | 27.80 | 25.15 | 13.60 | 100.00 | 34.03 | 45.92 | 45.92 |  |
| <b>All Assays %</b>    |        |       |       |       |        |       |       |       |        |       |       |       |  |
| <b>Total Ratio</b>     | 0.45   |       | 0.88  |       | 0.31   |       | 0.54  |       | 0.34   |       | 1.00  |       |  |
| <b>Total Ratio (%)</b> | 45     |       | 88    |       | 28     |       | 54    |       | 34     |       | 100   |       |  |
| <b>t-Test</b>          |        | 0.02  |       |       |        | 0.02  |       |       |        | 0.01  |       |       |  |

**Table S4: NFkB is suppressed by IKK in 6OHDA-treated dDCNs**

|                      | MEAN Control | MEAN IKK | MEAN treated | 6OHDA-MEAN treated | 6OHDA & IKK- |
|----------------------|--------------|----------|--------------|--------------------|--------------|
| NFkB Assay 1         | 0.918        | 0.000    | 1.488        | 0.000              |              |
| NFkB Assay 2         | 1.069        | 0.000    | 1.572        | 0.000              |              |
| NFkB Assay 3         | 1.148        | 0.000    | 1.444        | 0.000              |              |
| Mean Assay           | 1.045        | 0.000    | 1.502        |                    | 0.000        |
| <b>Mean Assay(%)</b> | <b>100</b>   | <b>0</b> | <b>144</b>   | <b>0</b>           |              |
| SD                   | 0.12         | 0.00     | 0.07         |                    | 0.00         |
| SD (%)               | 11.69        | 0.00     | 6.50         | 0.00               |              |
| <b>t-Test</b>        |              |          | <b>0.009</b> |                    |              |

**Table S5: IKK and zVADfmk promote survival of 6OHDA-treated dDCNs**

|                 | MEAN Control | MEAN IKK | MEAN zVADfmk | MEAN 6OHDA-treated | MEAN 6OHDA & zVADfmk | MEAN 6OHDA & IKK | MEAN 6OHDA & zVADfmk & IKK |
|-----------------|--------------|----------|--------------|--------------------|----------------------|------------------|----------------------------|
| Mean of Assay 1 | 2.059        | 2.035    | 2.103        | 0.535              | 1.004                | 1.285            | 1.539                      |
| Mean of Assay 2 | 2.121        | 2.099    | 2.051        | 0.671              | 0.955                | 1.203            | 1.545                      |
| Mean of Assay 3 | 2.114        | 2.109    | 2.123        | 0.631              | 1.205                | 0.934            | 1.539                      |
| Mean of All     | 2.098        | 2.081    | 2.092        | 0.612              | 1.055                | 1.141            | 1.541                      |

|               |      |      |      |      |              |              |              |
|---------------|------|------|------|------|--------------|--------------|--------------|
| Assays        |      |      |      |      |              |              |              |
| Mean of       | 100  | 99   | 100  | 29   | 50           | 54           | 73           |
| All Assays    |      |      |      |      |              |              |              |
| %             |      |      |      |      |              |              |              |
| SD            | 0.03 | 0.04 | 0.04 | 0.07 | 0.13         | 0.18         | 0.00         |
| (n)           | 3    | 3    | 3    | 3    | 3            | 3            | 3            |
| SQR           | 1.73 | 1.73 | 1.73 | 1.73 | 1.73         | 1.73         | 1.73         |
| SE            | 0.02 | 0.02 | 0.02 | 0.04 | 0.08         | 0.11         | 0.00         |
| SE %          | 1.97 | 2.31 | 2.15 | 4.04 | 7.65         | 10.60        | 0.20         |
| <b>t-Test</b> |      |      |      |      | <b>0.014</b> | <b>0.026</b> | <b>0.002</b> |

**Table S6: 6OHDA triggered apoptotic death in dDCNs**

|                       | MEAN<br>Control | MEAN<br>6OHDA | MEAN 6OHDA &<br>IKK | MEAN<br>6OHDA<br>&<br>zVADfmk | MEAN<br>6OHDA<br>&<br>zIETDfm k | MEAN 6OHDA<br>&<br>zVDVADfmk |
|-----------------------|-----------------|---------------|---------------------|-------------------------------|---------------------------------|------------------------------|
| Mean<br>of Assay 1    | 0.79            | 2.15          | 1.36                | 0.98                          | 1.26                            | 1.04                         |
| Mean of<br>Assay 2    | 0.82            | 2.19          | 1.27                | 0.99                          | 1.30                            | 1.06                         |
| Mean of<br>Assay 3    | 0.77            | 2.10          | 1.28                | 1.00                          | 1.27                            | 1.08                         |
| Mean<br>of All Assays | 0.79            | 2.15          | 1.31                | 0.99                          | 1.28                            | 1.06                         |
| <b>Mean of All</b>    | <b>100</b>      | <b>272</b>    | <b>165</b>          | <b>125</b>                    | <b>162</b>                      | <b>134</b>                   |
| <b>Assays%</b>        |                 |               |                     |                               |                                 |                              |
| SD                    | 0.025           | 0.045         | 0.049               | 0.011                         | 0.02                            | 0.02                         |
| (n)                   | 3               | 3             | 3                   | 3                             | 3                               | 3                            |
| SQR                   | 1.73            | 1.73          | 1.73                | 1.73                          | 1.73                            | 1.73                         |
| SE                    | 0.013           | 0.027         | 0.027               | 0.006                         | 0.011                           | 0.010                        |
| SE %                  | 1.343           | 2.711         | 2.689               | 0.611                         | 1.069                           | 0.976                        |
| <b>t-Test</b>         |                 |               | <b>0.00003</b>      | <b>0.0003</b>                 | <b>0.0002</b>                   | <b>0.0002</b>                |
